# Supplementary material for: miR451 and AMPK Mutual Antagonism in Glioma Cell Migration and Proliferation: A Mathematical Model
Source: PubMed Central journal article supplement (PMC3243681; doi:10.1371/journal.pone.0028293), 2011-12-20
Supplement: pone.0028293.s001.pdf [file pone.0028293.s001.pdf]

## Supporting Material

### miR451 and AMPK mutual antagonism in glioma cell migration and proliferation : A mathematical model

Yangjin Kim, Soyeon Roh, Sean Lawler, Avner Friedman

#### S1. Detailed description of the models and parameters used.

##### Parameter estimation

**Diffusion coefficients :**  $D_n, D_P, D_G$

$D_n$  : For EC cells migrating in a culture containing angiogenic factor, Stokes and Lauffenburger [1] measured the diffusion coefficient to be  $7 \times 10^{-9} \text{ cm}^2/s$ . A ‘typical’ animal’s cell motility coefficient has been estimated to be  $5 \times 10^{-10} \text{ cm}^2/s$  [2]. A smaller value,  $10^{-10} \text{ cm}^2/s$ , was used in [3]. While the experimental results for motility of human glioma [4] and glioblastoma cells [5] in 2D substrate suggest a value of  $D_n$  in the range of  $1.16 \times 10^{-10} - 2.31 \times 10^{-9} \text{ cm}^2/s$ , Stein *et al.* [6] used a 10-fold higher value of  $D_n$  ( $= 2.31 \times 10^{-8} \text{ cm}^2/s$ ) in order to get a better fit to the experimental data. Burgess *et al.* [7] took  $D_n = 1.7 \times 10^{-9} \text{ cm}^2/s$ , but Sander and Deisboeck [8] argued that  $D_n$  should be much smaller, namely,  $10^{-12} \text{ cm}^2/s$ . We shall take  $D_n = 10^{-11} \text{ cm}^2/s$ .

$D_P$  : In experiments of the movement of MMP-1 in the collagen fibril, Saffarian *et al.* [9] estimated the diffusion coefficient to be  $(8 \pm 1.5) \times 10^{-9} \text{ cm}^2/s$  for wild-type activated MMP-1 and  $(6.7 \pm 1.5) \times 10^{-9} \text{ cm}^2/s$  for inactive mutant. In our simulation, we take  $D_P = 5 \times 10^{-11} \text{ cm}^2/s$ .

$D_G$  : The diffusion coefficient of  $G$  was measured as  $6.7 \times 10^{-7} \text{ cm}^2/s$  in the brain [10] and  $1.3 \times 10^{-6} \text{ cm}^2/s$  in collagen gel [11]. The diffusion coefficient in a growing tumor spheroid or aggregate is much smaller than the one in the medium, and so we take  $D_G = 2.31 \times 10^{-7} \text{ cm}^2/s$ .

**chemo/hapto-taxis coefficients :**  $\chi_n, \chi_n^1$

In the presence of EGF, glioma cells travelled a distance 0.4-0.5cm in 150 hrs [12]; glioma cells in agar containing EGF travelled faster, covering a distance of 1.25cm in 150 hrs, while in plain agar they travelled only 0.75cm during the same period. In experiments with U87MGmEGFR spheroid growth, Deisboeck *et al.* [13] calculated the cell velocity to be in the range of  $50 - 110 \mu\text{m}/24\text{h}$ . Kim *et al.* [14] assumed that gradient of the glucose concentration was  $3 \times 10^{-3} - 10^{-4} \text{ g}/\text{cm}^4$  and a drift velocity  $25 - 110 \mu\text{m}/24\text{h}$  of mobile cells to compute an intermediate value of  $\chi_n = \frac{\text{velocity}}{\text{gradient}} = 2.76 \times 10^{-4} \text{ cm}^5/(g.s)$ . In this paper, we assume that the chemotactic sensitivity is relatively small due to the fluctuating glucose level. We take  $\chi_n = 1.86 \times 10^{-7} \text{ cm}^5 g^{-1} s^{-1}$ .

For the haptotactic sensitivity, we take  $\chi_n^1 = 4.17 \times 10^{-5} \text{ cm}^5/(g.s)$ .

##### other parameters

In the next subsection we shall determine reference values  $n^*, \rho^*, P^*, G^*$  for  $n, \rho, P, G$ .

$\lambda_{11}$  (tumor cell proliferation) : Doubling time were in the range from 27h (U87MG) to 60h (LN405) for human glioma cells [15]; this translates into proliferation rate of  $(7.1 - 8) \times 10^{-6} s^{-1}$ . Measured value of proliferation rate were reported as 1/day, or  $8 \times 10^{-6} s^{-1}$ , in typical experiments of Sander and Deisboeck [8]. Taking into consideration that large flux of glucose being supplied periodically in our system, we take  $\lambda_{11} = 1.112 \times 10^{-4} s^{-1}$ .

$\lambda_{31}$  (MMP production) : It is difficult to measure the MMP production rate directly. The range of  $(1.11 - 6.94) \times 10^{-8} s^{-1}$  was estimated in [14] for sparse migrating cells. The MMP production rate,

written as  $\lambda(n, \rho)$ , was modeled by  $\lambda_{31}n$  in [14] where  $\lambda_{31} = 6.94 \times 10^{-8} s^{-1}$ . Here, we model it as  $\lambda_{31}n\rho$ , because  $\rho$  is expected to oscillate quite significantly. In order to adjust to the order of magnitude of MMP production in [14], we take an estimated value,  $\lambda_{31} = 6.95 \times 10^{-5} cm^3 g^{-1} s^{-1}$ ; see also [15].

$\lambda_{32}$  (decay rate of MMP) : MMP is secreted by a tumor cell and is highly localized (fast decay) in the invading front of migrating tumor cells. We assume half-life of MMP to be very short (approximately 3.8 h) so that  $\lambda_{32} = 5.0 \times 10^{-5} s^{-1}$ .

$\lambda_{41}$  (consumption rate parameters) : Nutrient consumption rate was measured as  $\alpha = 1.6 pg/cell/min$  in [16]. We compute  $\lambda_{41}$  from  $\lambda_{41}G^\dagger = \alpha$  when  $G^\dagger = 8.9 \times 10^{-4} g/cm^3$  is between high ( $4.5 \times 10^{-3} g/cm^3$ ) and low ( $3.0 \times 10^{-4} g/cm^3$ ). Hence,  $\lambda_{41} = \frac{\alpha}{G^\dagger} = 0.3 cm^3/(g.s)$ .

Table 2 summarizes all the above parameter values.

## Nondimensionalization

### Tumor module

Table 3 lists reference values. We take  $T = 1$  hour and  $L = 1.0$  mm, so that so that  $D = \frac{L^2}{T} = 2.78 \times 10^{-6} cm^2/s$ . We determine the reference values for  $n, \rho, P, G$  as follows:

$n^*$  : We take  $n^* = 1 \times 10^{-3} g/cm^3$ . This is based on Chicoine *et al.* [12] who plated human glioma cells with density  $2.5-5 \times 10^5 cells/ml$  in agar gel to investigate the cell migration in the presence of growth factors.

$\rho^*$  : The main ECM component is collagen. Kaufman *et al.* (2005) investigated several patterns of different collagen I concentrations, and estimated  $\rho$  to be  $0.5-2.0 mg/ml$  for glioma spheroids of diameter  $\sim 200 \mu m$ . Stein *et al.* (2007) reported on experiments where U87 and U87 $\Delta$ EGFR were implanted into collagen I of concentration of  $2.6 mg/ml$ . We take  $\rho^* = 1.0 \times 10^{-3} g/cm^3$  as our reference value of ECM as in [14].

$P^*$  : Recently, it was observed that PCK3145 has the ability to downregulate MMP-9 level for prostate cancer patients with high levels of MMP-9  $> 100 \mu g/l$  [17]. We take  $P^* = 1.0 \times 10^{-7} g/cm^3$  as in [14].

$G^*$  : Sander and Deisboeck (2002) [8] used the characteristic concentration of glucose  $2 \times 10^{-4} g/cm^3$ , and took the boundary condition  $6 \times 10^{-4} g/cm^3$  for glucose concentration far from the tumor (see also [13]). In [18], high ( $4.5 g/l = 4.5 \times 10^{-3} g/cm^3$ ) and low ( $0.3 g/l = 3.0 \times 10^{-4} g/cm^3$ ) glucose levels were introduced. We take this high value as a reference value so that dimensionless value of glucose ( $G = 1$ ) corresponds to the high glucose level.

We nondimensionalize the variables and parameters in the partial differential equations (11)-(14) as follows:

$$\begin{aligned} \bar{t} &= \frac{t}{T}, \quad \bar{x} = \frac{r}{L}, \quad \bar{n} = \frac{n}{n^*}, \quad \bar{n}_0 = \frac{n_0}{n^*}, \quad \bar{G} = \frac{G}{G^*}, \quad \bar{\rho} = \frac{\rho}{\rho^*}, \quad \bar{\rho}_0 = \frac{\rho_0}{\rho^*}, \quad \bar{P} = \frac{P}{P^*}, \\ \bar{D}_n &= \frac{D_n}{D}, \quad \bar{D}_P = \frac{D_P}{D}, \quad \bar{D}_G = \frac{D_G}{D}, \quad \bar{\lambda}_{11} = T\lambda_{11}, \quad \bar{\lambda}_{21} = T\lambda_{21}P^*, \\ \bar{\lambda}_{22} &= \lambda_{22}T, \quad \bar{\lambda}_{31} = \frac{\lambda_{31}Tn^*\rho^*}{P^*}, \quad \bar{\lambda}_{32} = T\lambda_{32}, \quad \bar{\lambda}_{41} = T\lambda_{41}n^*, \quad \bar{\lambda}_{42} = \frac{T\lambda_{42}}{G^*}, \\ \bar{\chi}_n &= \frac{\chi_n G^* T}{L^2}, \quad \bar{\chi}_n^1 = \frac{\chi_n^1 \rho^* T}{L^2}. \end{aligned}$$

We choose  $\lambda_G$  and  $\lambda_\rho$  such that  $\bar{\lambda}_G = \bar{\lambda}_\rho = 1$ . If we drop the bar (“-”) in the new variables and parameters, then the differential equations remain unchanged.

### Internal dynamics module

In order to mathematically model the dynamical network shown in Figure 3 the dimensional version of the dynamical system for the internal dynamics was derived as follows:

$$\begin{aligned}\frac{dm}{dt} &= g + \frac{\Lambda_1 \Lambda_2^2}{\Lambda_2^2 + \Lambda_5 a^2} - \mu_1 m, \\ \frac{da}{dt} &= s + \frac{\Lambda_3 \Lambda_4^2}{\Lambda_4^2 + \Lambda_6 m^2} - \mu_2 a,\end{aligned}$$

where  $m(t)$  and  $a(t)$  are concentrations of miR-451 and the AMPK complex at time  $t$ ,  $s$  is source of the complex,  $g$  is the glucose level within the experimental system,  $\Lambda_1$  and  $\Lambda_3$  are the autocatalytic enhancement parameters for miR-451 and the complex respectively,  $\Lambda_2$  and  $\Lambda_5$  are the Hill-type inhibition saturation parameters from the counter part of miR-451 and the complex respectively,  $\Lambda_5$  is the inhibition strength of miR-451 by the complex,  $\Lambda_6$  is the inhibition strength of the complex by miR-451,  $\mu_1$  and  $\mu_2$  are the decay rates of miR-451 and the complex respectively.

The following dimensionalization was performed to get the dimensionless key control equations in the main section

$$\begin{aligned}T = \mu_1 t, \quad M = \frac{m}{m^*}, \quad A = \frac{a}{a^*}, \quad G = \frac{g}{\mu_1 m^*}, \quad S = \frac{s}{\mu_2 a^*}, \quad k_1 = \frac{\Lambda_1}{\mu_1 m^*}, \\ k_2 = \Lambda_2, \quad k_3 = \frac{\Lambda_3}{\mu_2 a^*}, \quad k_4 = \Lambda_4, \quad \alpha = \Lambda_5 (a^*)^2, \quad \beta = \Lambda_6 (m^*)^2, \quad \epsilon = \frac{\mu_1}{\mu_2}.\end{aligned}$$

miRs are typically more stable than their targets [19, 20] and the parameter  $\epsilon$  is small [21]. Typical half-life of AMPK is measured to be 6 h [22] ( $\mu_2 \sim 0.12h^{-1}$ ) while the half-life of a miRNA is much larger 101-225 h in a recent study [23]. We take a slightly larger half-life of miR-451, 290 h, leading to  $\mu_1 = 0.0024 h^{-1}$  and  $\epsilon = \frac{\mu_1}{\mu_2} = 0.02$ . miRNA concentrations in an animal cell (assuming 1000-25,000  $\mu m^3$  volume) were estimated to be 80 pM – 2.2  $\mu M$  [24] and we take our reference value  $m^* = 1.0 \mu M$ . Based on the high (4.5 g/l) and low (0.3 g/l) glucose level in [18] and  $m^*$ , we estimate glucose supply rate through several pathways  $g = (2.4 \times 10^{-5} - 2.4 \times 10^{-3}) \mu M/h$  resulting in a range of dimensionless glucose input levels  $G = \frac{g}{\mu_1 m^*} = 0.01 - 1.0$ . AMPK concentration was measured as 35-150 nM in rat liver [25] and we take  $a^* = 100nM$ . We take the signal source of the AMPK complex,  $s = 2.4 nM/h$  leading to  $S = \frac{s}{\mu_2 a^*} = 0.2$ . The autocatalytic rate ( $\Lambda_1$ ) of miR-451 is assumed to be 4-fold larger than its negative contribution ( $\mu_1 m^*$ ) from its decay in the absence of inhibition pathway from the AMPK module,  $k_1 = \frac{\Lambda_1}{\mu_1 m^*} = 4.0$  (Similarly for its counterpart, the AMPK complex, we take  $k_3 = \frac{\Lambda_3}{\mu_2 a^*} = 4.0$ ). The Hill-type dimensionless parameters  $\Lambda_2, \Lambda_4$  (and their corresponding  $k_2, k_4$  without change) are fixed to be equal to 1. Finally, the inhibition strength ( $\alpha = 1.6$ ) of miR-451 by the AMPK complex was assumed to be a bit stronger than the inhibition strength ( $\beta = 1.0$ ) of the AMPK complex by miR-451.

Table 1 summarizes all the above parameter values for the internal dynamics model (1)-(2).

## References

1. Stokes CL, Lauffenburger DA (1991) Analysis of the roles of microvessel endothelial cell random motility and chemotaxis in angiogenesis. J theor Biol 152: 377–403.
2. Bray D (2000) Cell Movements: From Molecules to Motility. Garland Pub.
3. Anderson ARA, Chaplain MAJ (1998) Continuous and discrete mathematical models of tumor-induced angiogenesis. Bull Math Biol 60: 857–900.

4. Demuth T, Hopf N, Kempfski O, Sauner D, Herr M, et al. (2000) Migratory activity of human glioma cell lines in vitro assessed by continuous single cell observation. *Clin Exp Metastasis* 18: 589-97.
5. Hegedus B, Zach J, Czirok A, Lovey J, Vicsek T (2004) Irradiation and taxol treatment result in non-monotonous, dose-dependent changes in the motility of glioblastoma cells. *J Neurooncol* 67: 147-57.
6. Stein A, Demuth T, Mobley D, Berens M, Sander L (2007) A mathematical model of glioblastoma tumor spheroid invasion in a three-dimensional in vitro experiment. *Biophys J* 92: 356-65.
7. Burgess P, Kulesa P, Murray J, EC J (1997) The interaction of growth rates and diffusion coefficients in a three-dimensional mathematical model of gliomas. *J Neuropathol Exp Neurol* 56: 704-13.
8. Sander L, Deisboeck T (2002) Growth patterns of microscopic brain tumors. *Phys Rev E* 66: 051901.
9. Saffarian S, Collier I, Marmer B, Elson E, Goldberg G (2004) Interstitial collagenase is a brownian ratchet driven by proteolysis of collagen. *Science* 306: 108-11.
10. Jain R (1987) Transport of molecules in the tumor interstitium: a review. *Cancer Res* 47: 3039-51.
11. Rong Z, Cheema U, Vadgama P (2006) Needle enzyme electrode based glucose diffusive transport measurement in a collagen gel and validation of a simulation model. *Analyst* 131: 816-21.
12. Chicoine M, Madsen C, Silbergeld D (1995) Modification of human glioma locomotion in vitro by cytokines egf, bfgf, pdgfb, ngf, and tnf alpha. *Neurosurgery* 36: 1165-70; disbrain cancer.
13. Deisboeck T, Berens M, Kansal A, Torquato S, Stemmer-Rachamimov A, et al. (2001) Pattern of self-organization in tumour systems: complex growth dynamics in a novel brain tumour spheroid model. *Cell Prolif* 34: 115-134.
14. Kim Y, Lawler S, Nowicki M, Chiocca E, Friedman A (2009) A mathematical model of brain tumor : pattern formation of glioma cells outside the tumor spheroid core. *J Theo Biol* 260: 359-371.
15. Mercapide J, Cicco R, Castresana J, Klein-Szanto A (2003) Stromelysin-1/matrix metalloproteinase-3 (mmp-3) expression accounts for invasive properties of human astrocytoma cell lines. *Int J Cancer* 106: 676-82.
16. Li C (1982) The glucose distribution in 9l rat brain multicell tumor spheroids and its effect on cell necrosis. *Cancer* 50: 2066-73.
17. Annabi B, Bouzeghrane M, Currie J, Hawkins R, Dulude H, et al. (2005) A psp94-derived peptide pck3145 inhibits mmp-9 secretion and triggers cd44 cell surface shedding: implication in tumor metastasis. *Clin Exp Metastasis* 22: 429-39.
18. Godlewski J, Nowicki M, Bronisz A, Palatini GNJ, Lay MD, et al. (2010) Mircrona-451 regulates lkb1/ampk signaling and allows adaptation to metabolic stress in glioma cells. *Molecular Cell* 37: 620-632.
19. Khanin R, Vinciotti V (2008) Computational modeling of post-transcriptional gene regulation by micrnas. *J Comput Biol* 15: 305-316.
20. Yao G, Lee T, Mori S, Nevins J, You L (2008) A bistable rb-e2f switch underlies the restriction point. *Nat Cell Biol* 10: 476-482.

21. Aguda B, Kim Y, Hunter M, Friedman A, Marsh C (2008) MicroRNA regulation of a cancer network: Consequences of the feedback loops involving mir-17-92, e2f, and myc. *PNAS* 105: 19678-19683.
22. Crute B, Seefeld K, Gamble J, Kemp B, Witters L (1998) Functional domains of the alpha1 catalytic subunit of the amp-activated protein kinase. *J Biol Chem* 273: 35347-54.
23. Gantier M, McCoy C, Rusinova I, Saulep D, Wang D, et al. (2011) Analysis of microRNA turnover in mammalian cells following dicer1 ablation. *Nucleic Acids Res* 39: 5692-703.
24. Ragan C, and MA Ragan MZ (2011) Quantitative prediction of mirna-mrna interaction based on equilibrium ' concentrations. *PLoS Comput Biol* 7: e1001090:doi:10.1371/journal.pcbi.1001090.
25. Hardie D, Salt I, Hawley S, Davies S (1999) Amp-activated protein kinase : an ultrasensitive system for monitoring cellular energy charge. *Biochem J* 338: 717-722.
